# Supplementary material for: Structural divergence in binuclear Cu(ii) pyridoxal Schiff base complexes probed by co-ligands: catecholase mimetic activity and sulphide ion sensing
Source: Royal Society of Chemistry journal article supplement (doi:10.1039/d0nj00719f), 2020-01-01
Supplement: d0nj00719f1.pdf [file d0nj00719f1.pdf]

### Supporting Information:

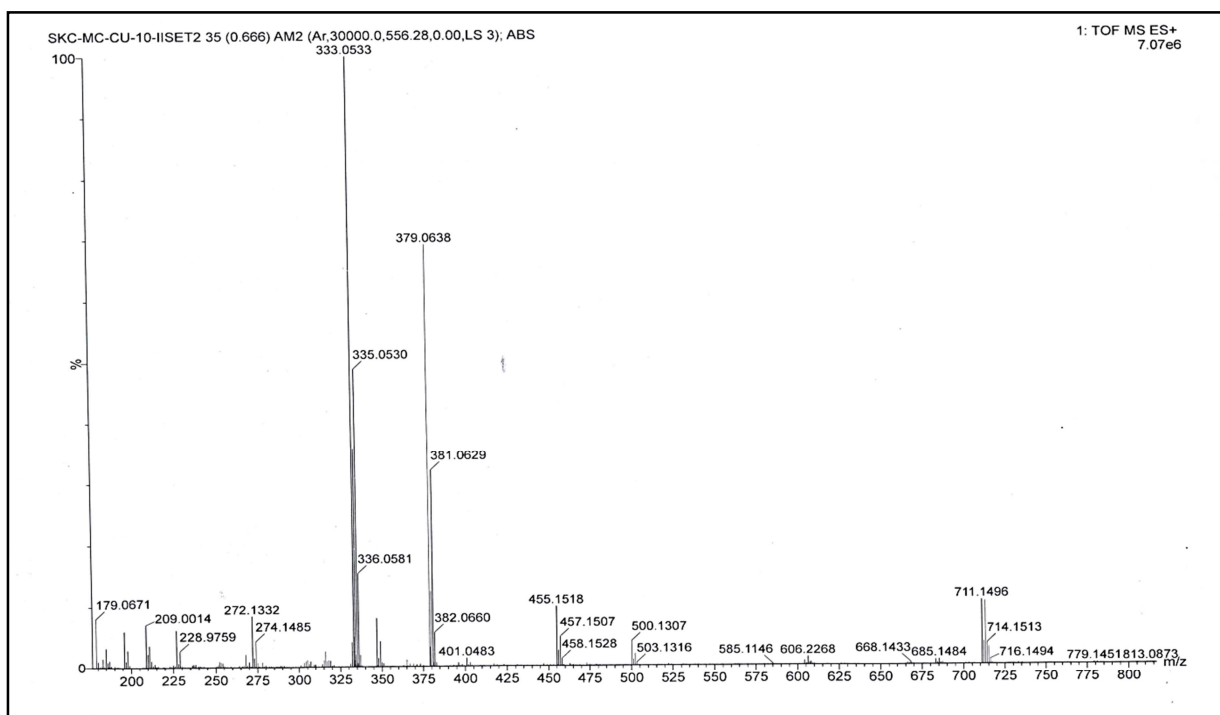

Fig. S1: ESI-MS spectra of complex 1.

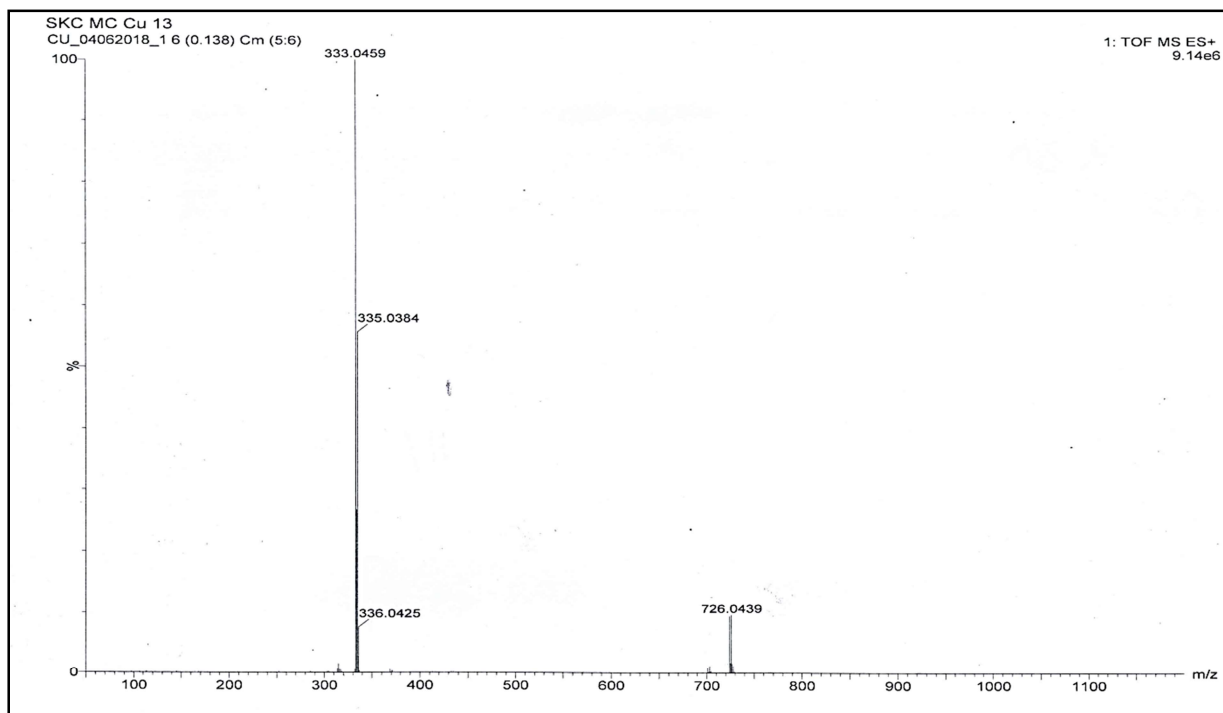

Fig. S2: ESI-MS spectra of complex 2.

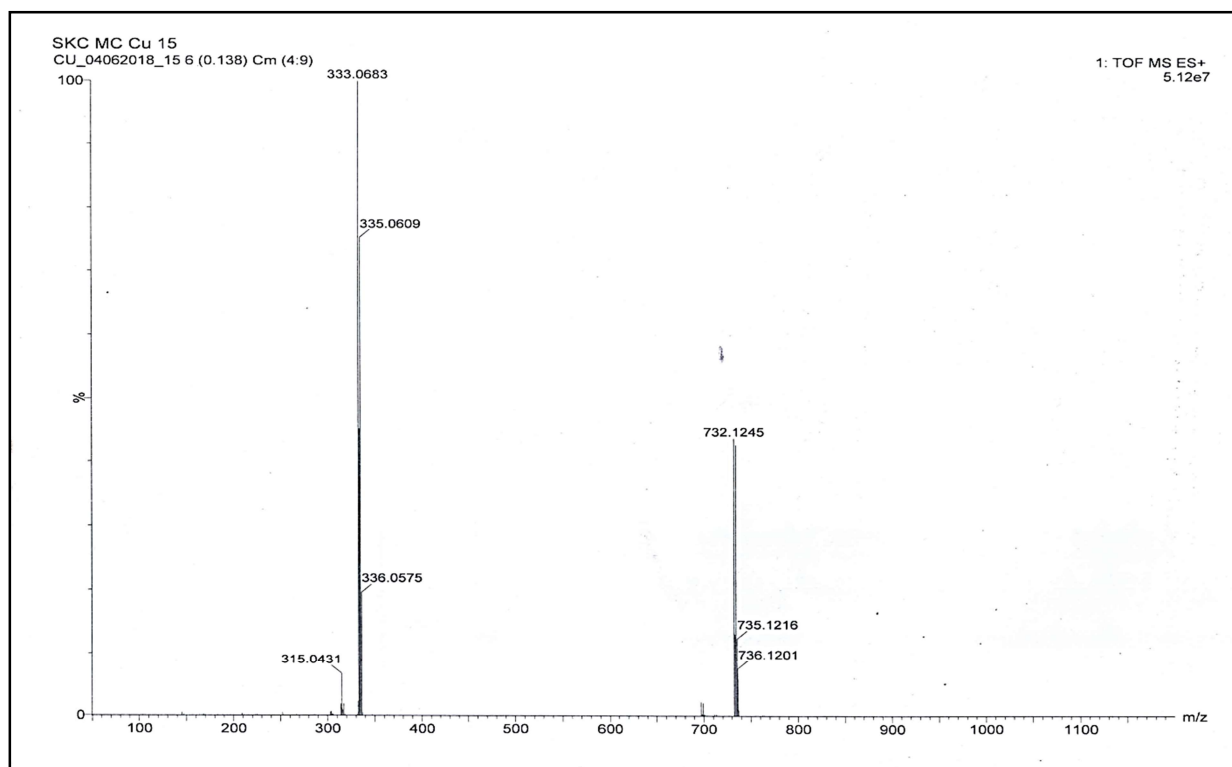

Fig. S3: ESI-MS spectra of complex 3.

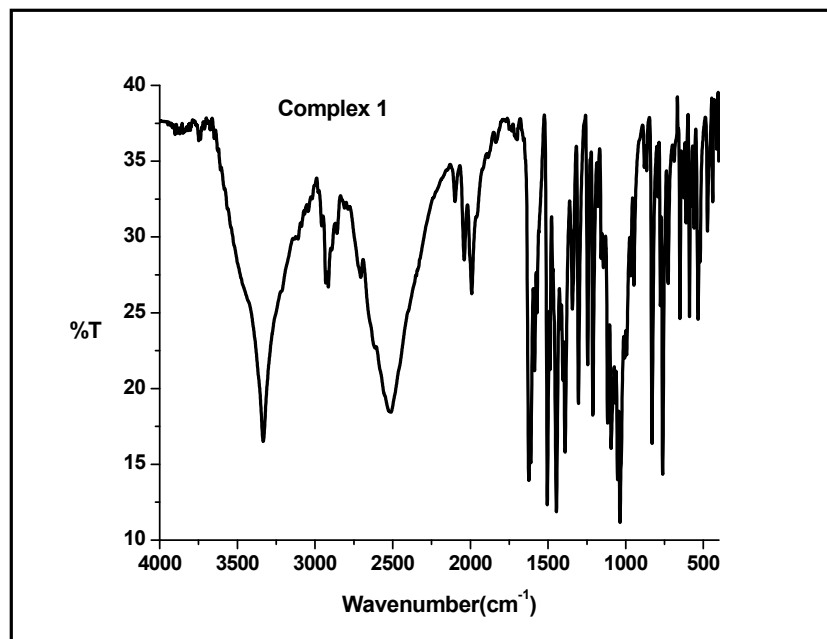

Fig. S4: IR spectra of complex 1.

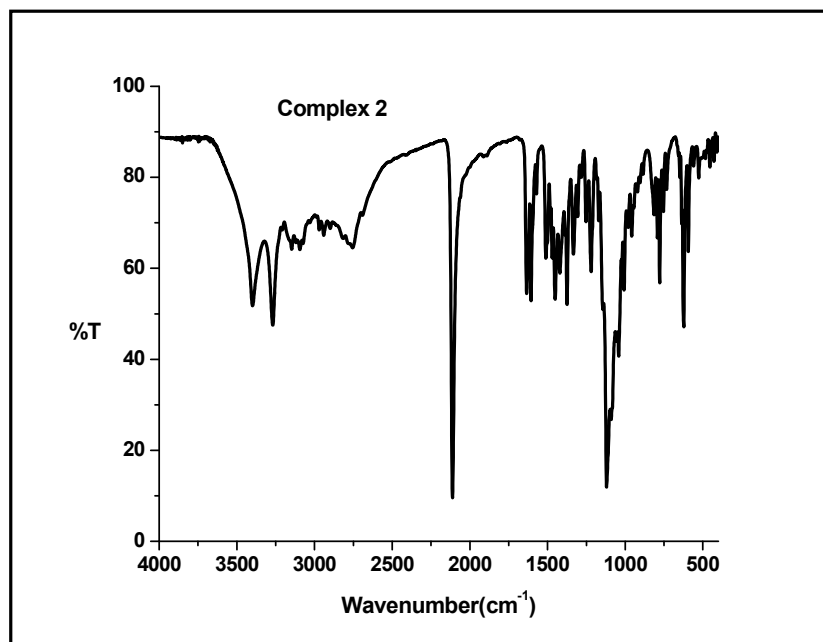

Fig. S5: IR spectra of complex 2.

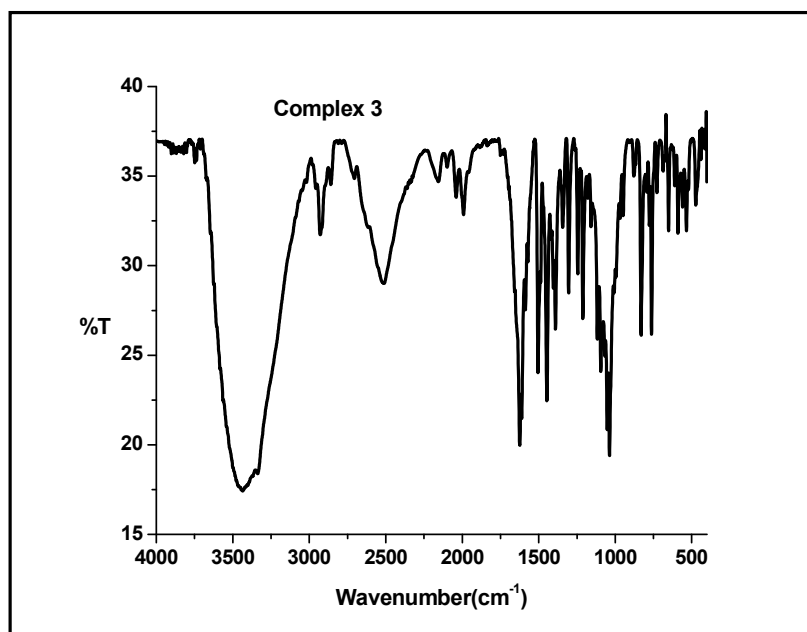

Fig. S6: IR spectra of complex 3.

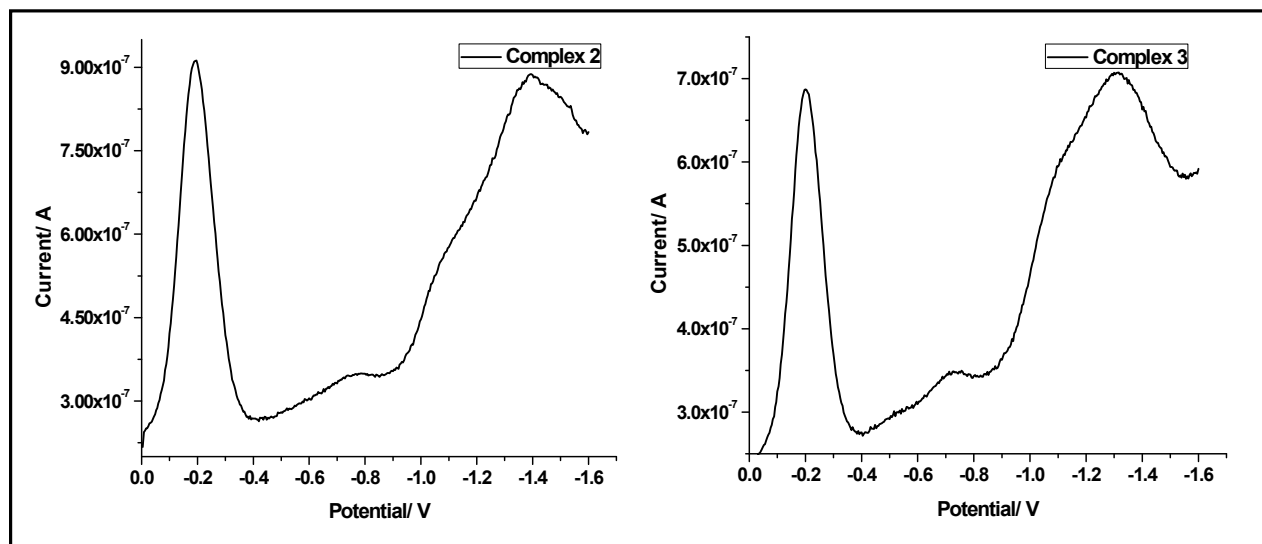

Fig.S7: Differential Pulse Voltamograms of complexes 2 and 3 in DMF medium.

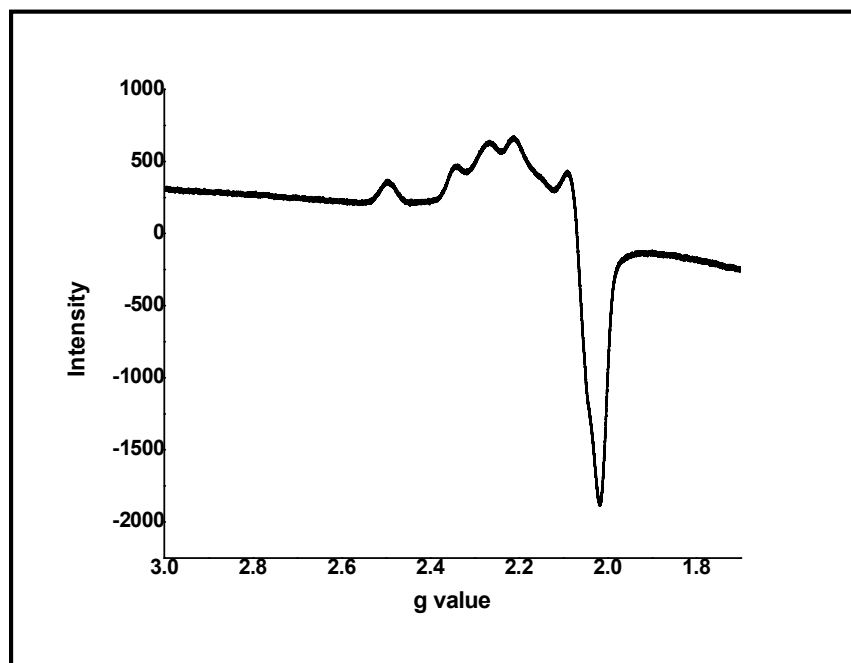

Fig. S8: X-band EPR spectra of complex 3.

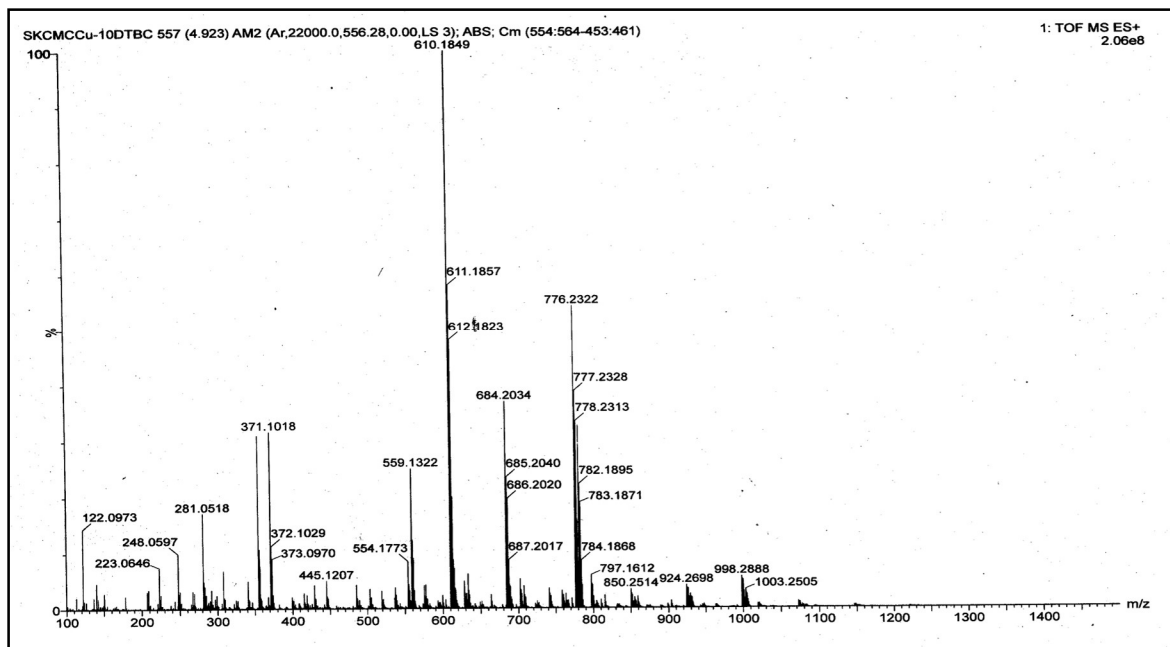

**Fig. S9:** ESI-MS of a 1:100 mixture of complex **1** and 3,5-DTBC in MeOH after 10-15 minutes of mixing.

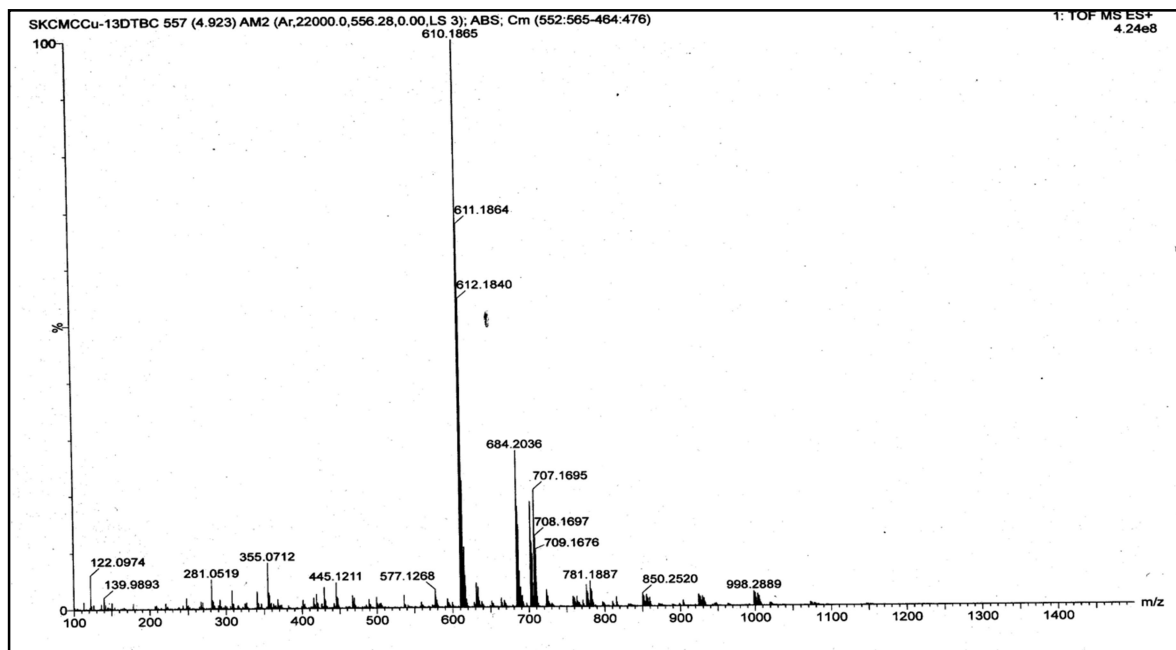

**Fig. S10:** ESI-MS of a 1:100 mixture of complex **2** and 3,5-DTBC in MeOH after 10-15 minutes of mixing.

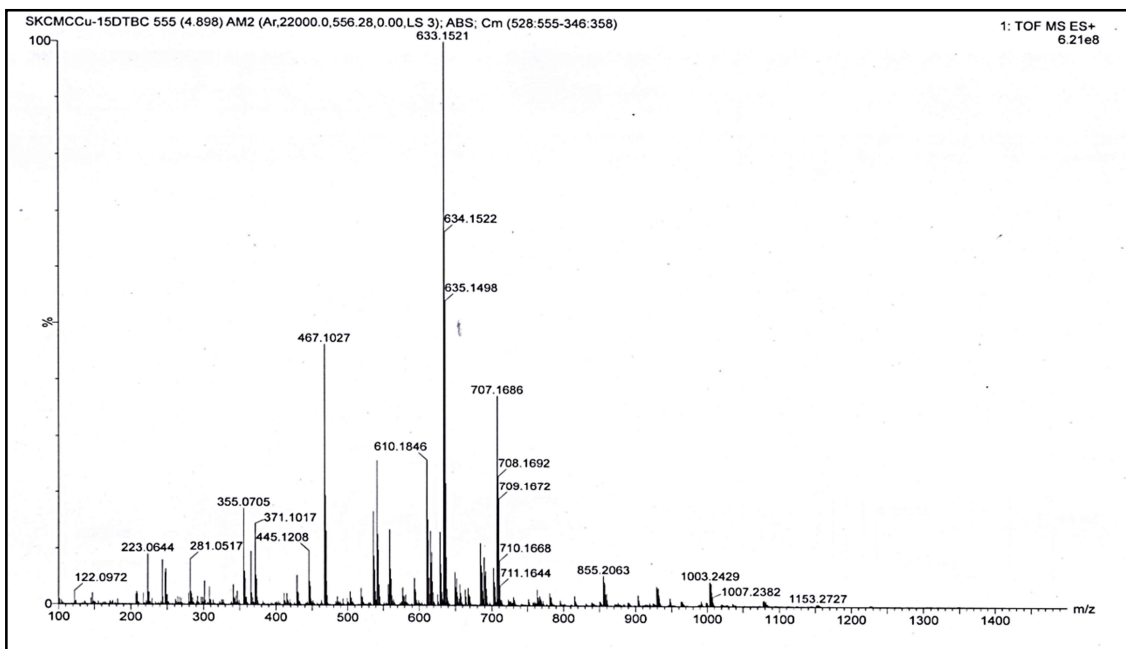

**Fig. S11:** ESI-MS of a 1:100 mixture of complex **3** and 3,5-DTBC in MeOH after 10-15 minutes of mixing.

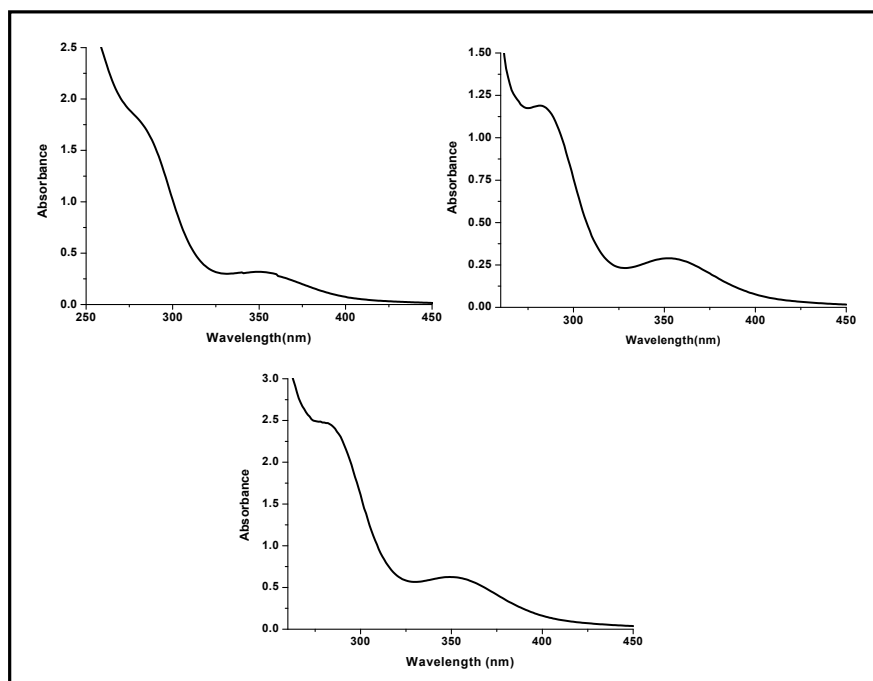

**Fig. S12:** Electronic spectra of  $I_3^-$  obtained from the oxidation of  $I^-$  by  $H_2O_2$  generated during catechol oxidation catalysed by complexes **1**, **2** and **3**.

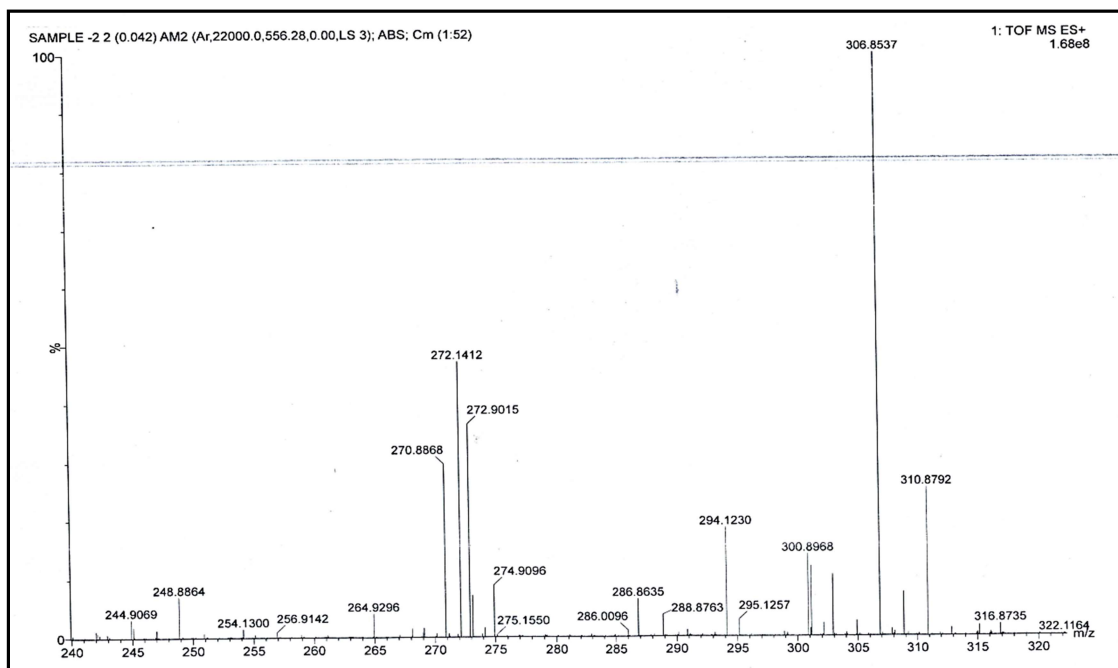

Fig. S13: ESI-MS of complex 1 with excess of Na<sub>2</sub>S.

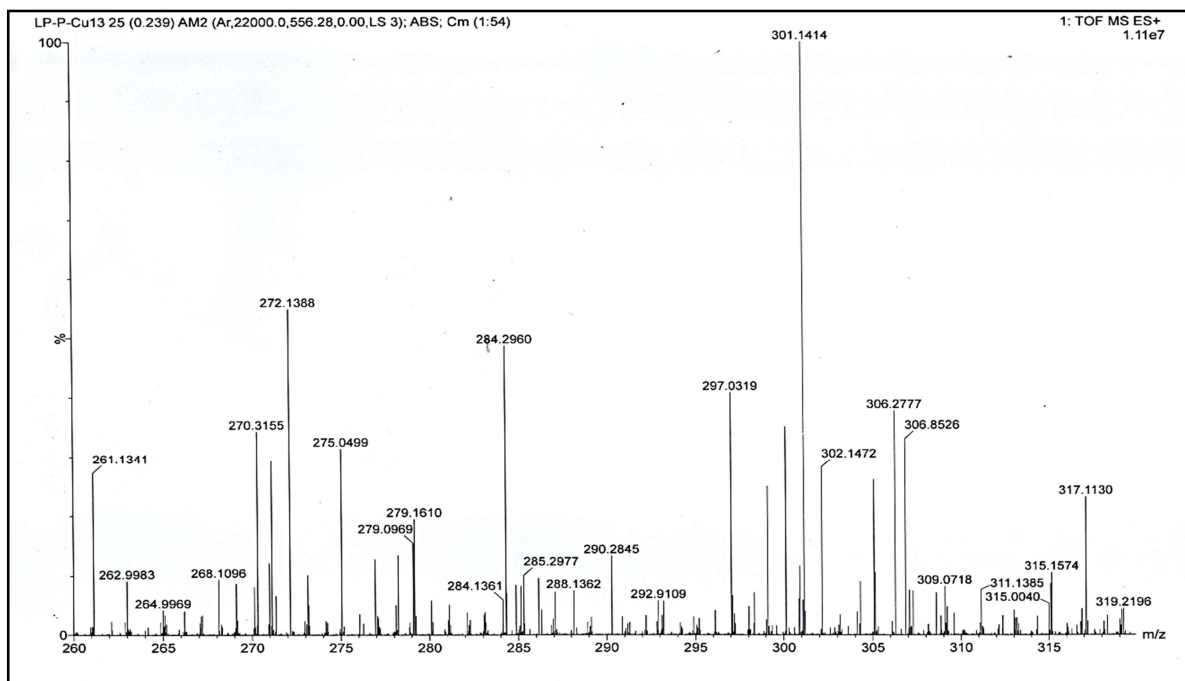

Fig. S14: ESI-MS of complex 2 with excess of Na<sub>2</sub>S.
